# Supplementary material for: Strategic deployment of feature-based attentional gain in primate visual cortex
Source: PLOS journal article supplement (doi:10.1371/journal.pbio.3000387), 2019-08-06

### Population activity profiles, number of cells= 88

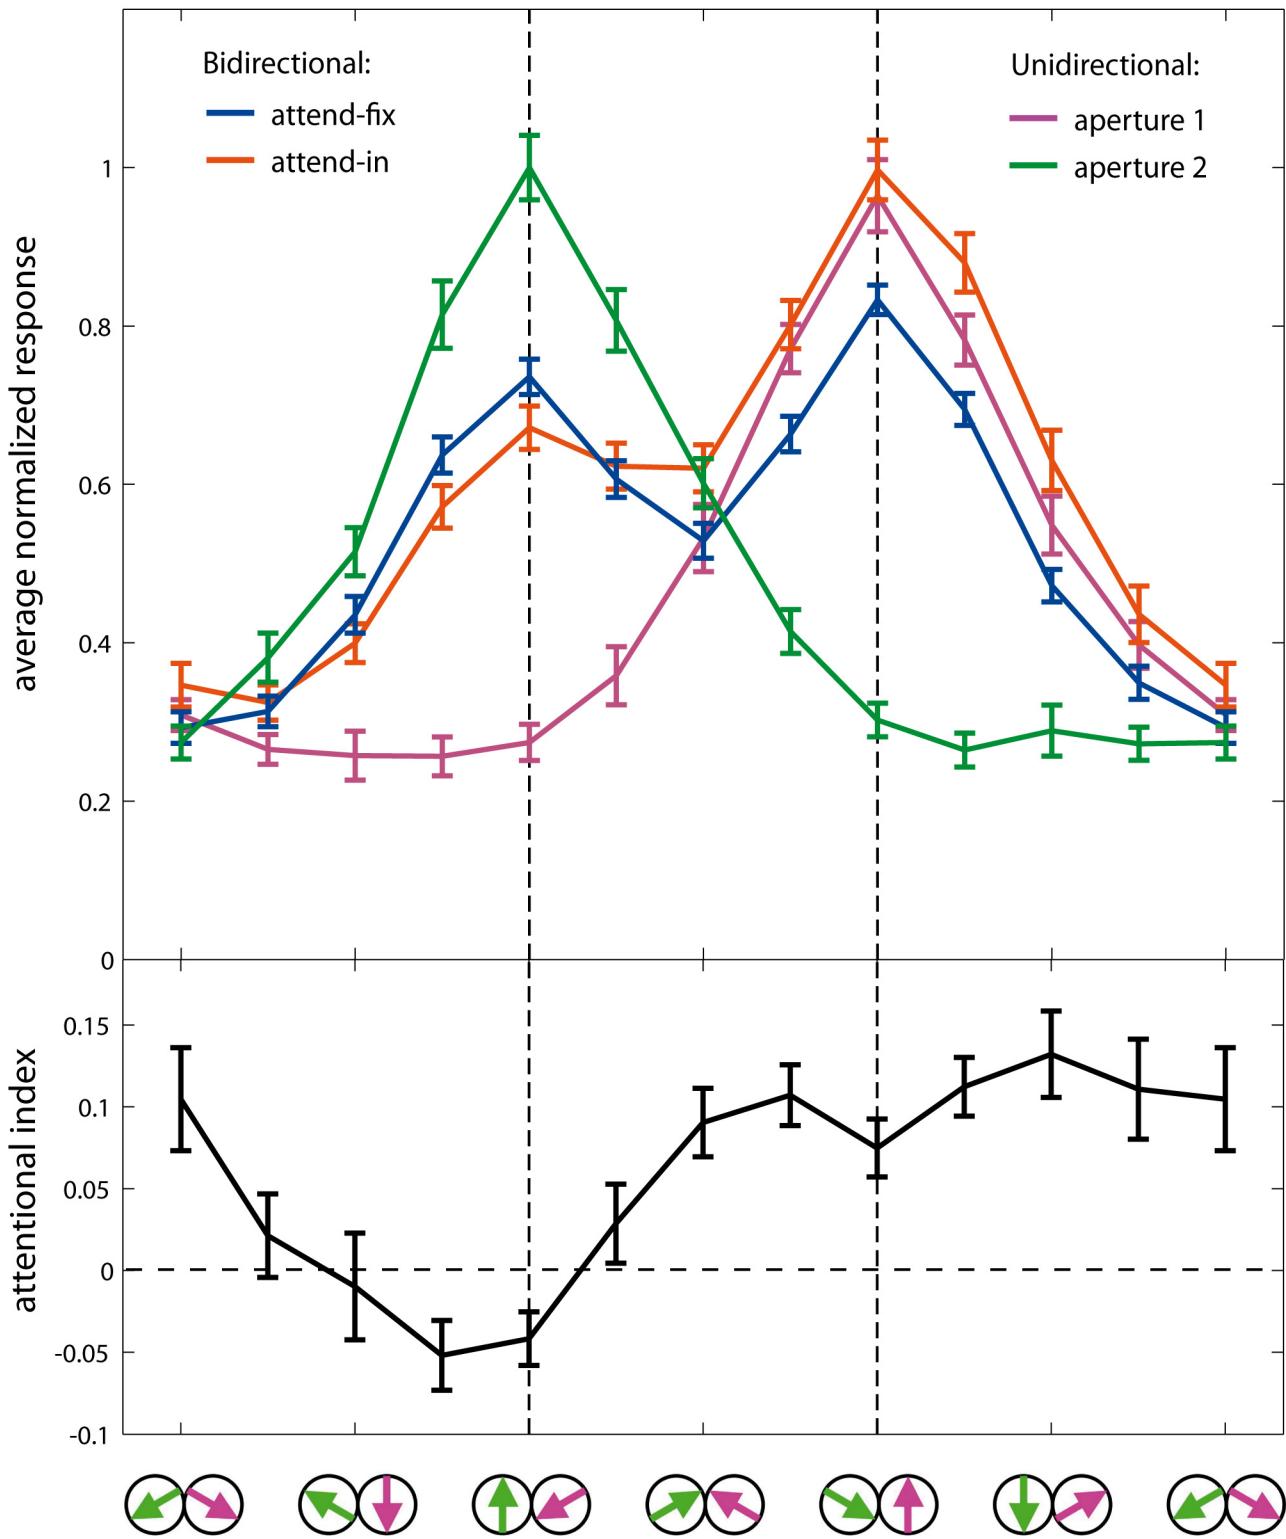

Supplement: S13 (10.1371/journal.pbio.3000387.s013) [file journal.pbio.3000387.s013]
